# Supplementary material for: Mutation-class dependent signatures outweigh disease-associated processes in cystic fibrosis cells
Source: PubMed Central journal article supplement (PMC9912517; doi:10.1186/s13578-023-00975-y), 2023-02-09

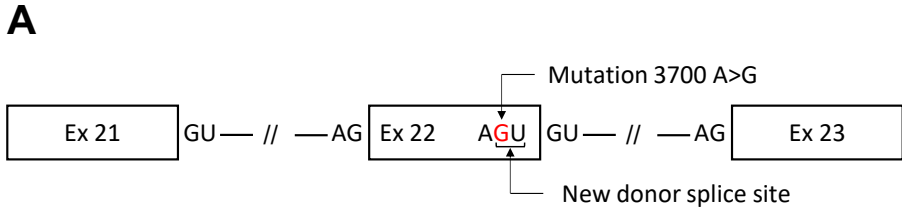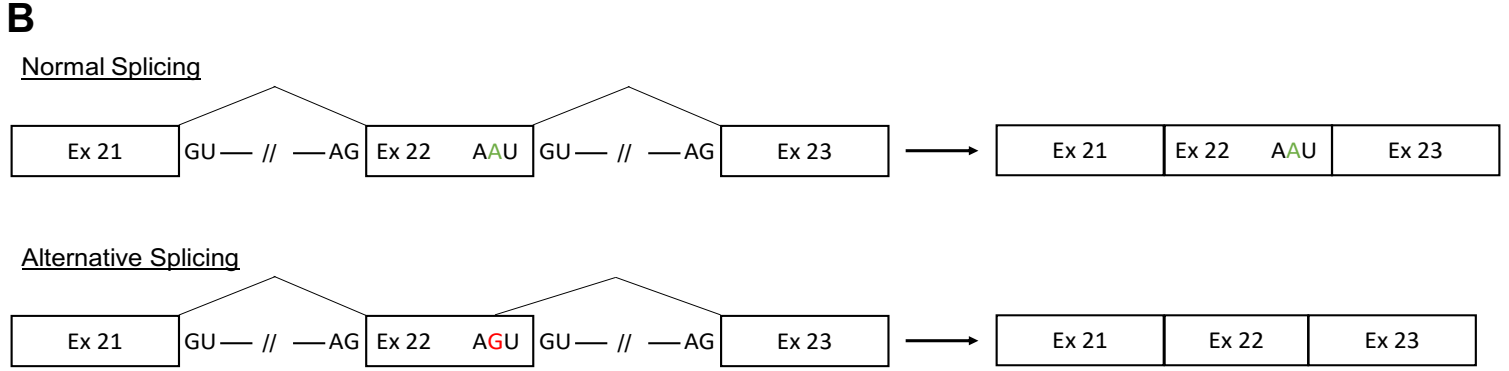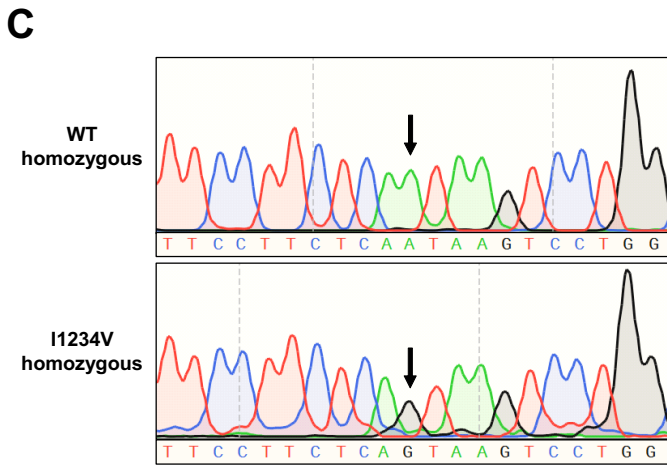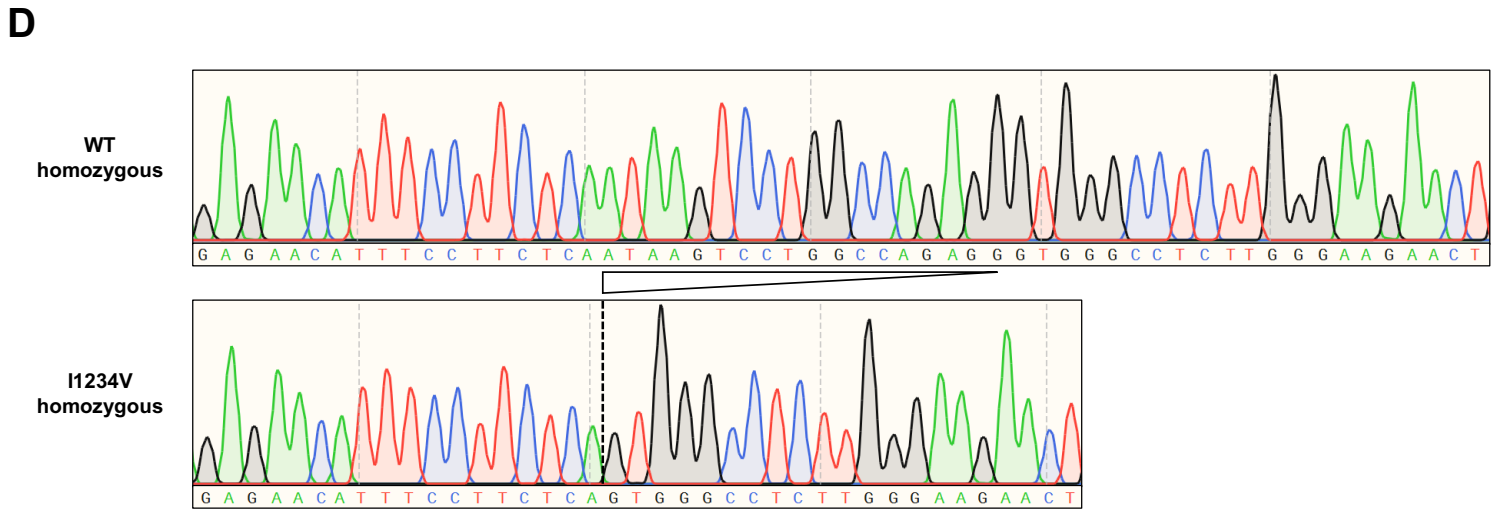

A

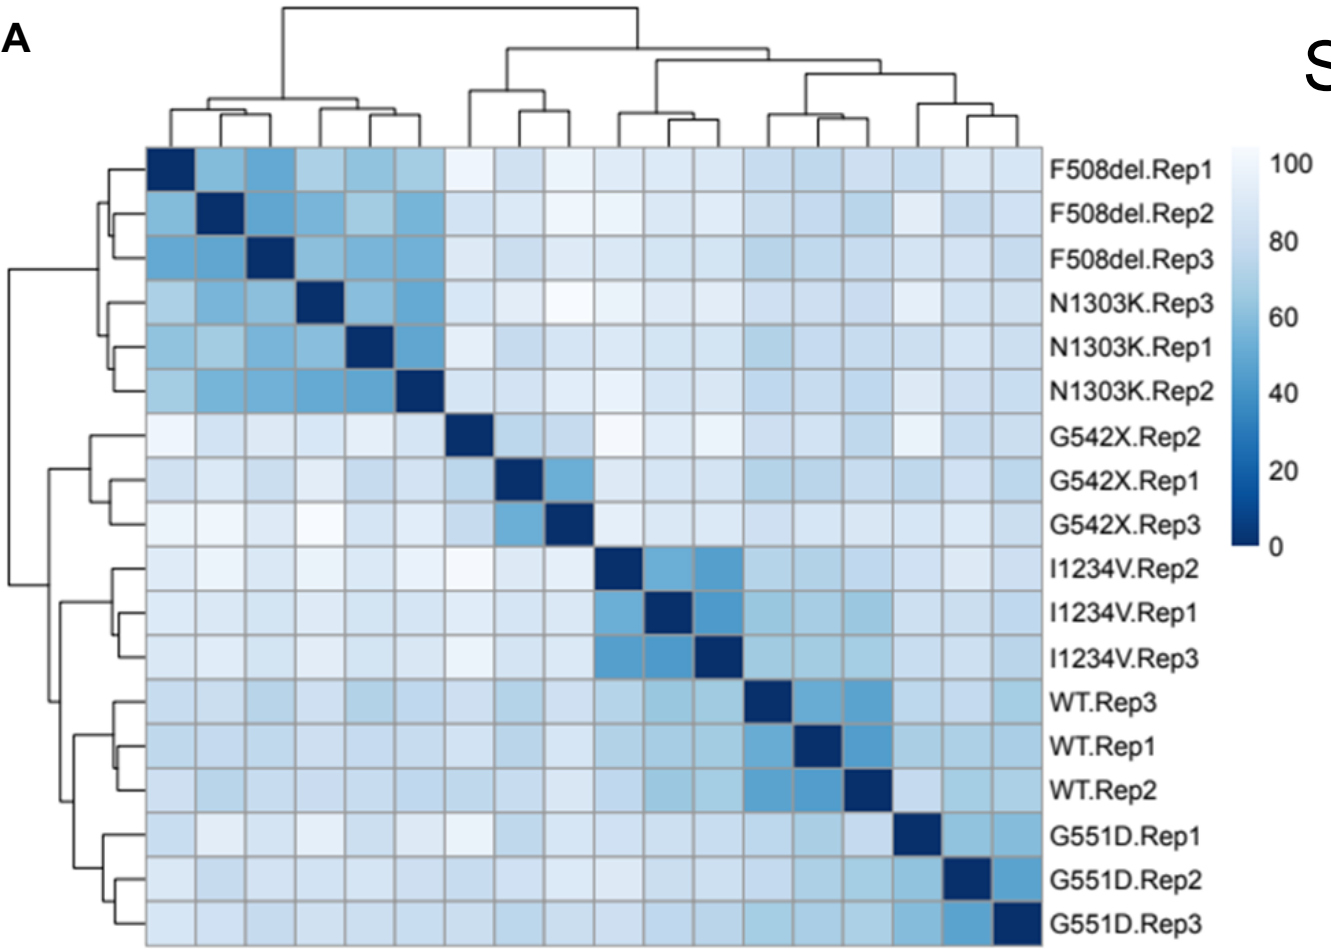

B

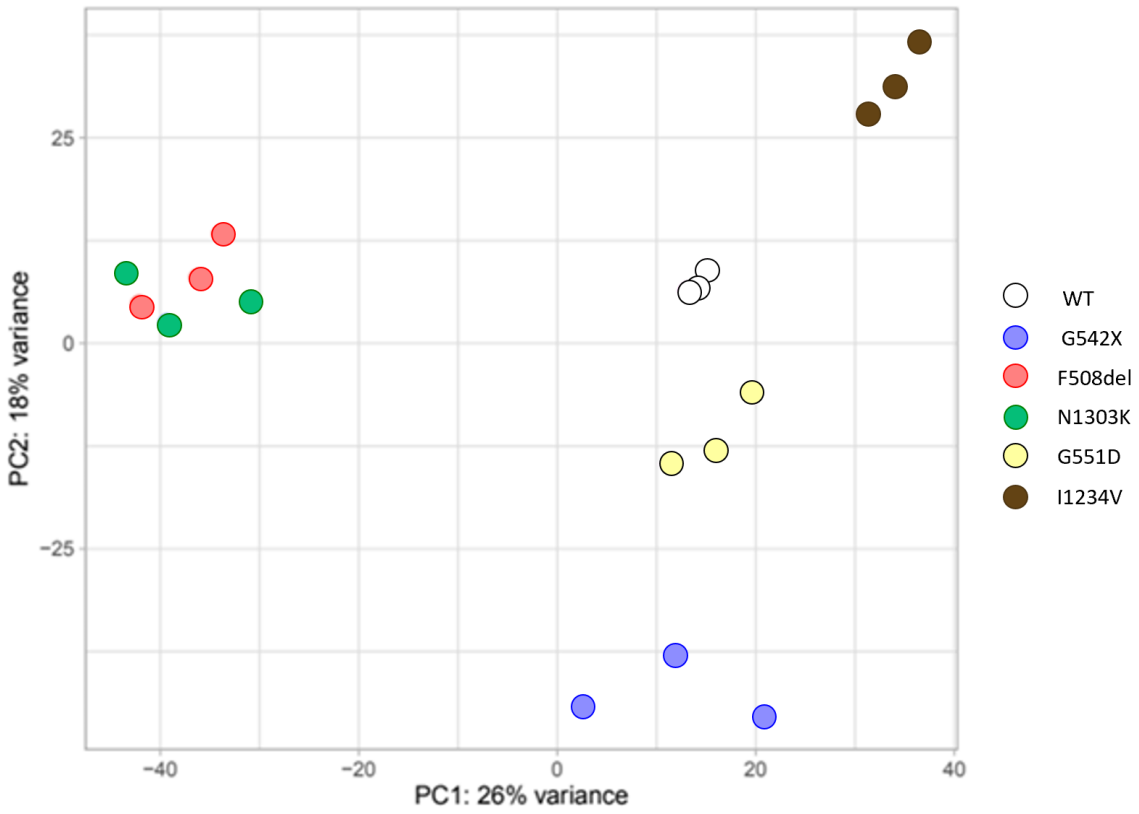

**A**

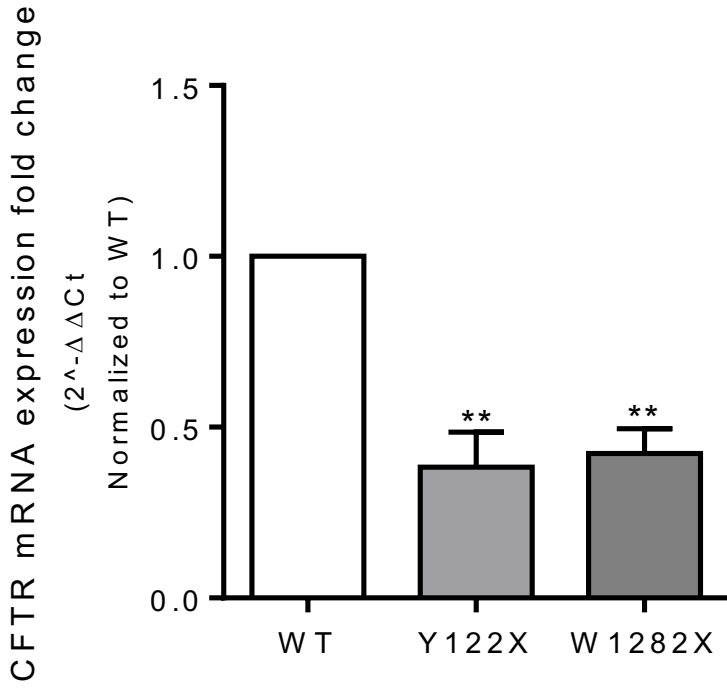

**B**

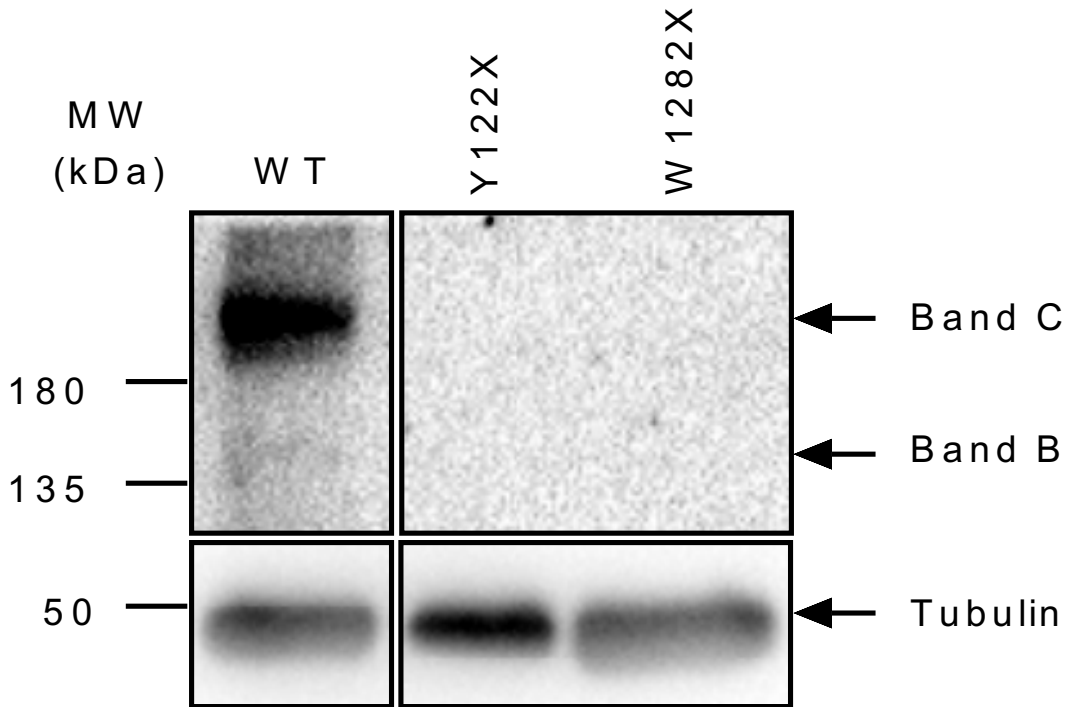

**A**

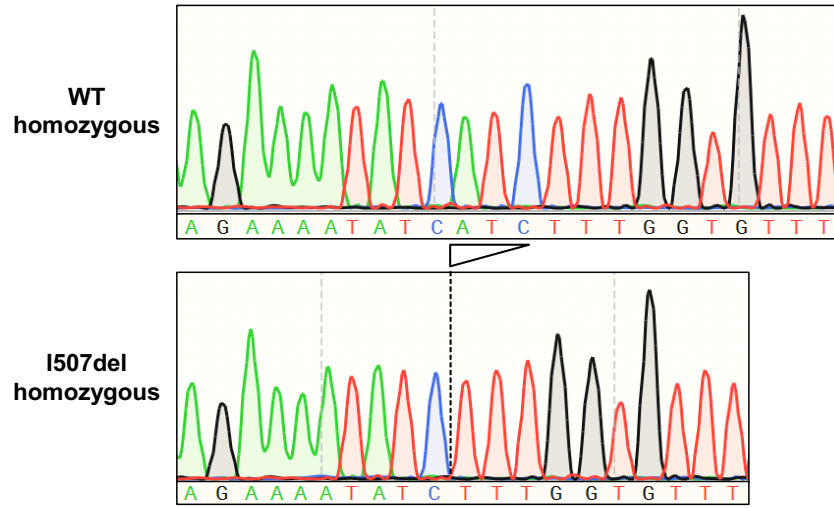

**B**

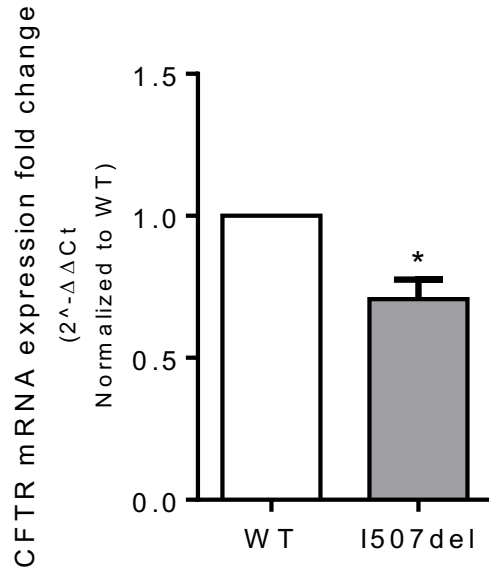

**C**

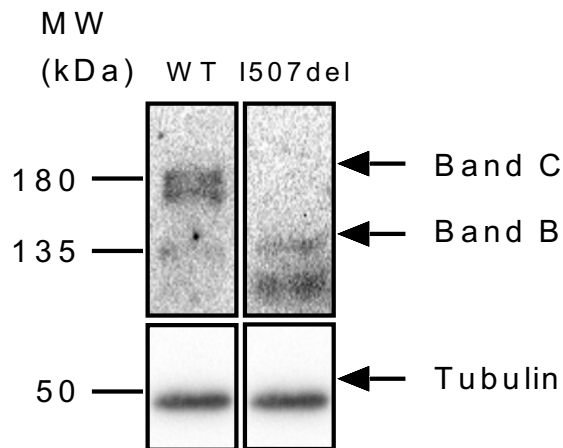

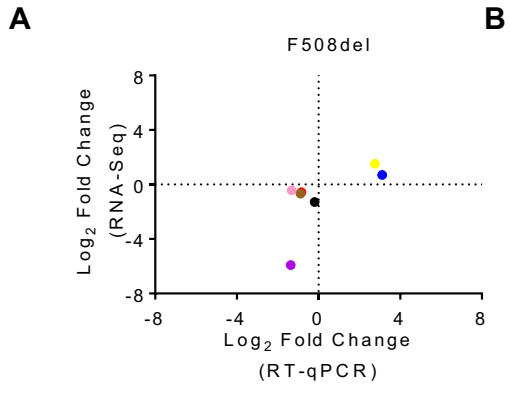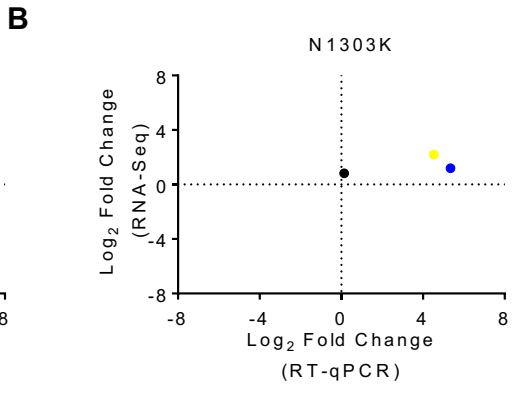

- Legend:
- ARHGAP45
  - ATP5D
  - IFI44
  - IFIT1
  - NIBAN1
  - TMEM259
  - TMX4

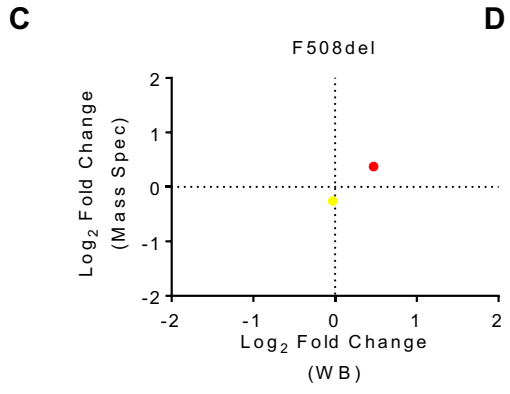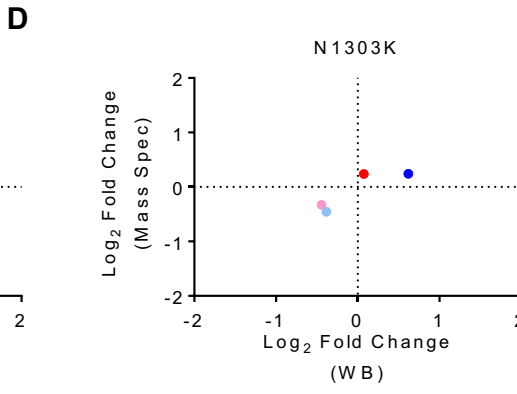

- Legend:
- ESYT1
  - FN1
  - GARS1
  - SERPINH1
  - UBP14

Scores for D1 (20.1 %) versus D2 (20.1 %), Pareto (DA)

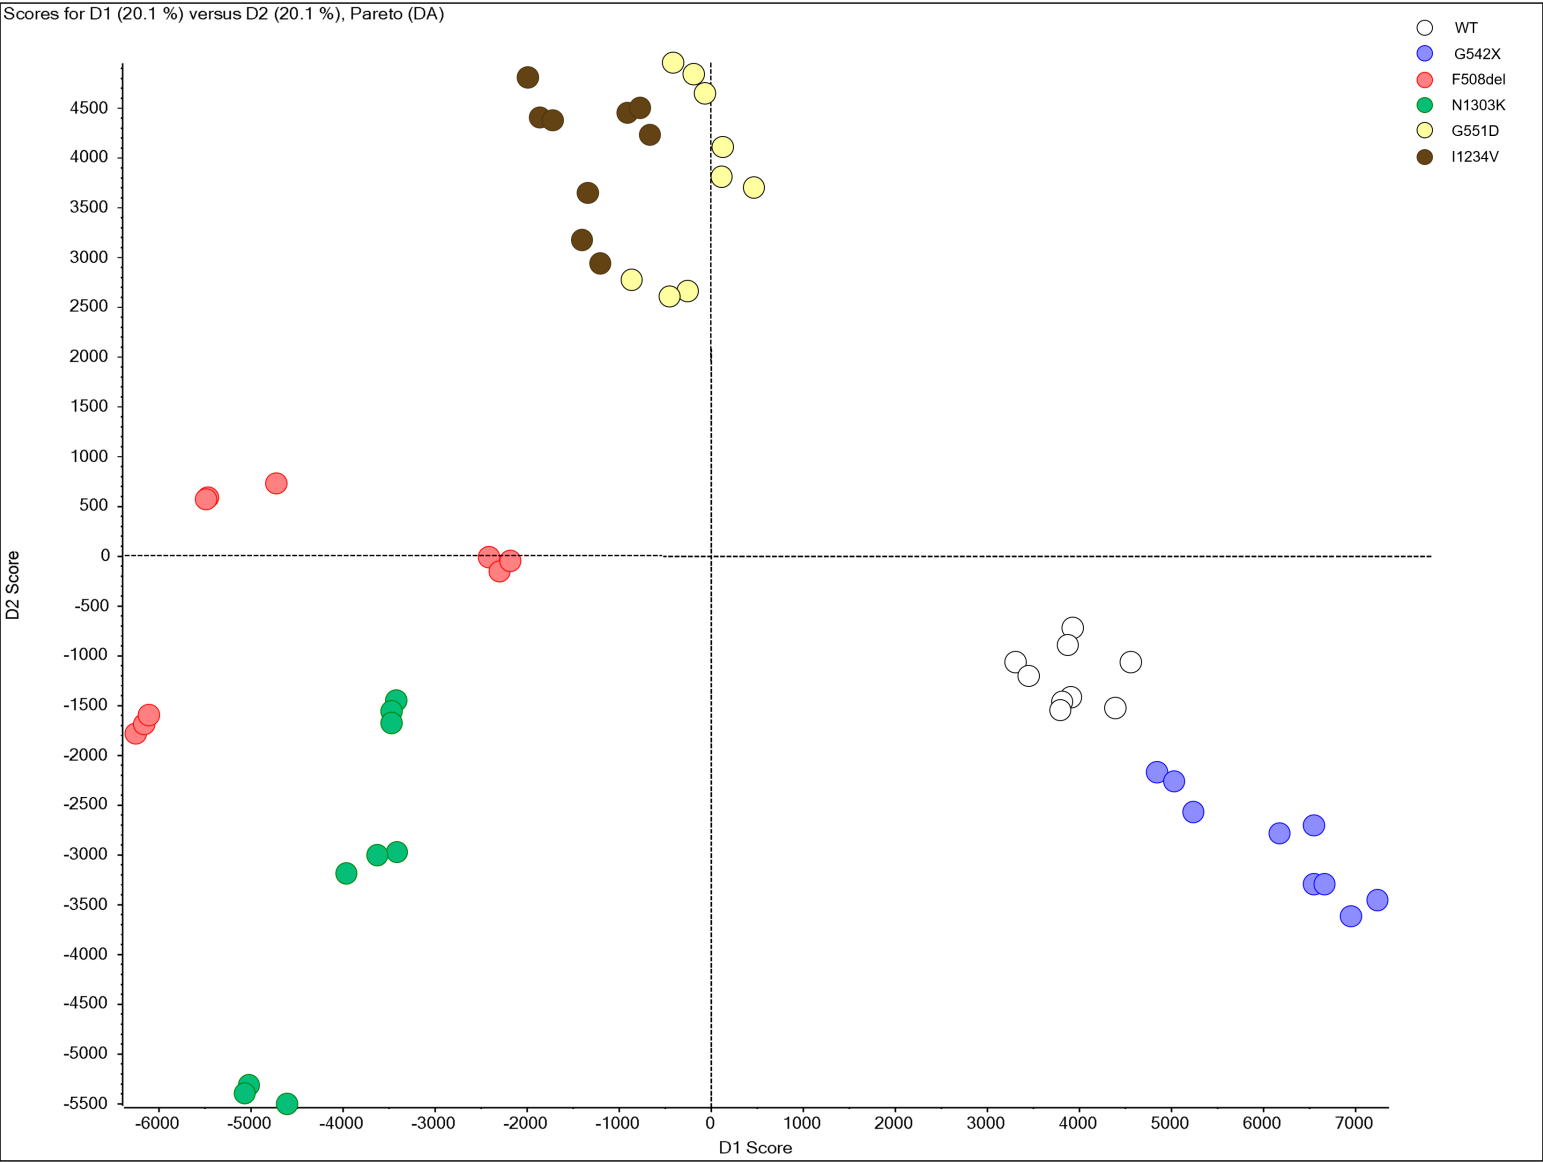

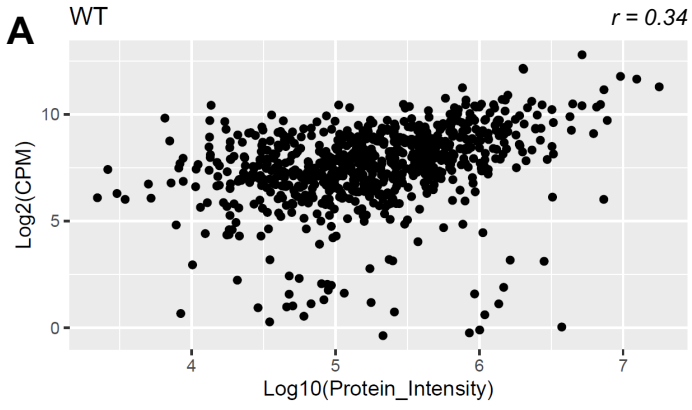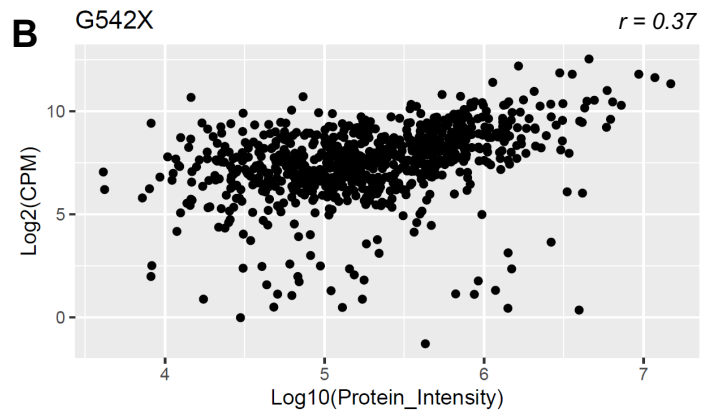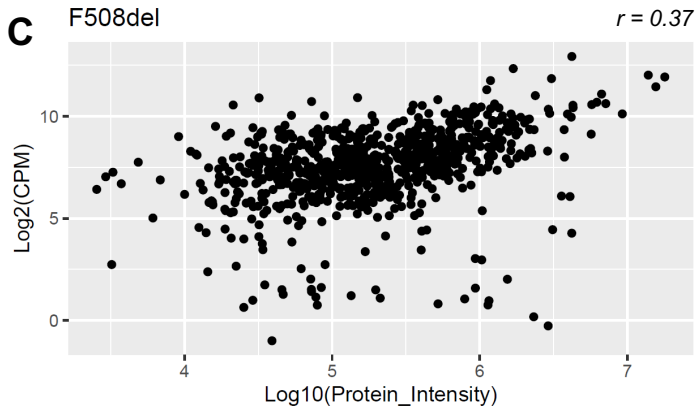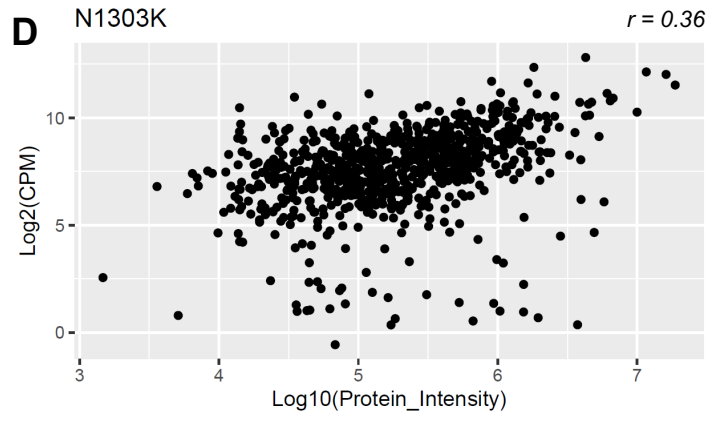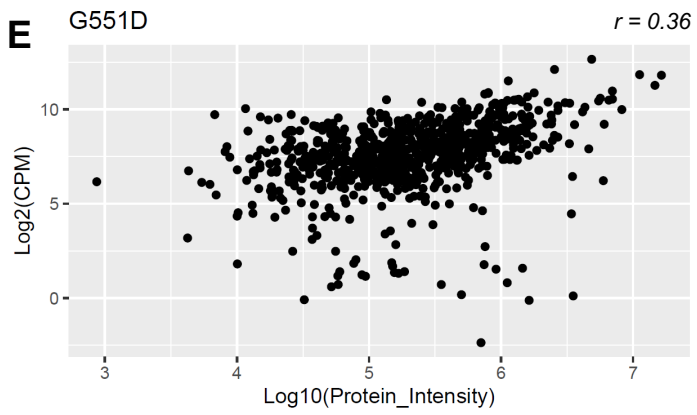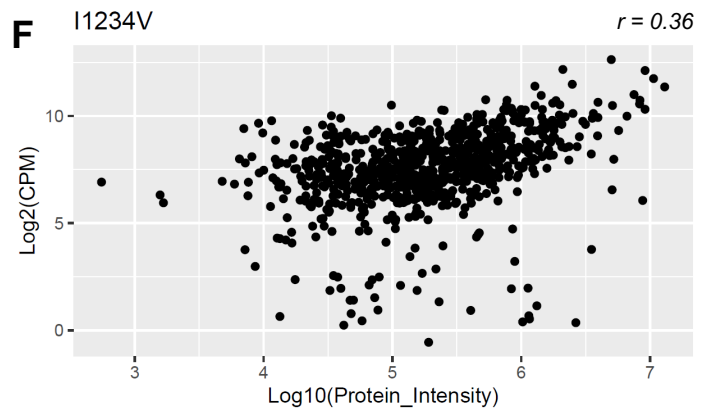

Supplement: 13578_2023_975_MOESM2_ESM.pdf [file 13578_2023_975_MOESM2_ESM.pdf]
