# Supplementary material for: Mutation-class dependent signatures outweigh disease-associated processes in cystic fibrosis cells
Source: PubMed Central journal article supplement (PMC9912517; doi:10.1186/s13578-023-00975-y), 2023-02-09
Supplement: 13578_2023_975_MOESM1_ESM.pdf [file 13578_2023_975_MOESM1_ESM.pdf]

## Additional file Tables

**Table S1. RT-qPCR primers sequences used for transcriptomics data validation.**

| <b>Gene</b> | <b>Forward primer (5' - 3')</b> | <b>Reverse primer (5' - 3')</b> | <b>PCR length (bp)</b> |
|-------------|---------------------------------|---------------------------------|------------------------|
| ARHGAP45    | GCCCCATCATGTTCTCCAGG            | GGGCAGCTCCCCCGA                 | 107                    |
| ATP5D       | TGTTGGACCTGGGGGCG               | GGTACGCACCGCCTACTCC             | 149                    |
| HERC5       | AGTAGACGAACTCTTGCACCG           | TTTTCTGAAGCGTCCACAGTCA          | 87                     |
| IFI44       | TGGGAGCTGGACCCTGTAAA            | TTCCCTCCCTTAGATTCCCTATTTGC      | 120                    |
| IFIT1       | ATTTACAGCAACCATGAGTACAAA        | TCCCACACTGTATTTGGTGTC           | 172                    |
| ISG15       | ACAGCCATGGGCTGGGA               | CTCTGACACCGACATGGAGC            | 87                     |
| NIBAN1      | GCCGTCGGATCAACCTCC              | AGCCTCAGTTTTCCCTCGGA            | 148                    |
| TMEM259     | GCTCCATCAAGTTTGAGCTGGAC         | TCCTGCGGCCACACTTTG              | 124                    |
| TMX4        | AAAGGATGGGATATTCGCGCG           | ACCAGCCATTCCAGACATCGTTA         | 145                    |
| ZFP28       | AATGGCCTCGCATCCAAAGG            | GTCACCAAGCCCTGGGACA             | 161                    |

**Table S2. Primary antibodies used for proteomics data validation.**

| <b>Primary antibody</b> | <b>Antibody isotype</b> | <b>Source</b>            | <b>Dilution</b> |
|-------------------------|-------------------------|--------------------------|-----------------|
| BACH                    | Mouse                   | Santa Cruz (sc-376808)   | 1:500           |
| ERO1A                   | Mouse                   | Santa Cruz (sc-100805)   | 1:500           |
| ESYT1                   | Mouse                   | Santa Cruz (sc-514488)   | 1:500           |
| FINC                    | Mouse                   | Santa Cruz (sc-8422)     | 1:500           |
| GARS                    | Mouse                   | Santa Cruz (sc-365311)   | 1:500           |
| RAN                     | Mouse                   | Santa Cruz (sc-271376)   | 1:500           |
| RPN1                    | Rabbit                  | Proteintech (12894-1-AP) | 1:500           |
| SERPH                   | Mouse                   | Santa Cruz (sc-5293)     | 1:500           |
| UBP14                   | Mouse                   | Santa Cruz (sc-100630)   | 1:1000          |
| VPS35                   | Mouse                   | Santa Cruz (sc-374372)   | 1:500           |
